# Supplementary material
Source: PubMed Central journal article supplement (PMC3370526)
Supplement: supp_78.12.4288_AEM07718-11_FigS1.pdf [file supp_78.12.4288_AEM07718-11_FigS1.pdf]

Uchima et al  
Supplementary Fig. 1

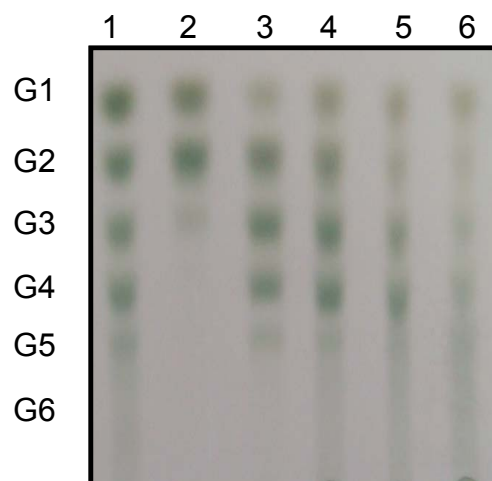

**FIG. S1.** TLC analysis of cello-oligosaccharides reacted with G1mgNtBG1. Lane 1, standard cello-oligosaccharides; lane 2, G1mgNtBG1 + cellobiose; lane 3, G1mgNtBG1 + cellotriose; lane 4, G1mgNtBG1 + cellotetraose; lane 5, G1mgNtBG1 + cellopentaose; lane 6, G1mgNtBG1 + cellohexaose.
